# Supplementary material
Source: MDPI journal article supplement (https://www.mdpi.com/2673-9976/18/1/6)
Supplement: s1 [file s1 › blsf-2034236-supplementary.pdf]

# Histopathological evaluation of mice's liver and kidney after exposure to an elderberry extract

T. Azevedo <sup>1\*</sup>, T. Ferreira <sup>1</sup>, L. Barros <sup>2</sup>, I.C.F.R. Ferreira <sup>2</sup>, M. L. Pinto <sup>3</sup>, P.A. Oliveira <sup>1</sup>

<sup>1</sup> Centre for the Research and Technology of Agro-Environmental and Biological Sciences (CITAB), Inov4Agro, University of Trás-os-Montes and Alto Douro (UTAD), Vila Real, Portugal; <sup>2</sup> Centro de Investigação de Montanha (CIMO), Instituto Politécnico de Bragança, Campus de Santa Apolónia, Bragança, Portugal; <sup>3</sup> Animal and Veterinary Research Centre (CECAV), UTAD, Vila Real, Portugal;

\* tiagoazevedo99@gmail.com

Foods  
2022

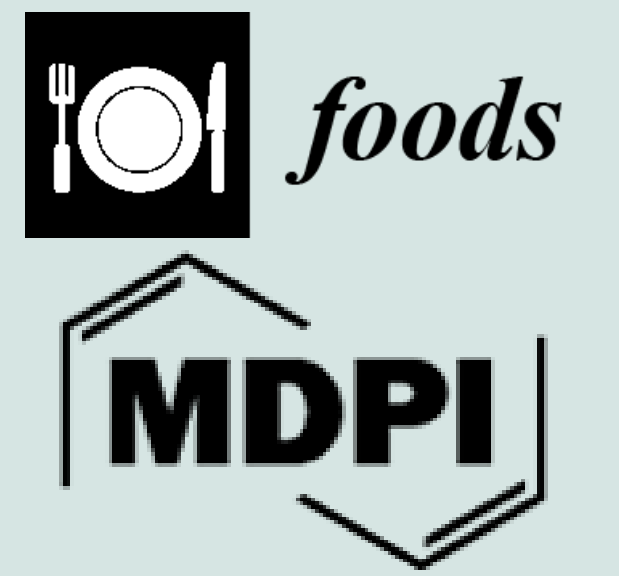

## Introduction

**Elderberry** (*Sambucus nigra* L.) is recognised for its use as a **food source**, **food additive**, in **nutraceuticals**, and in **folk medicine**. Its berries are highly concentrated in **flavonoids**, particularly **anthocyanins**, well-known for their **colorant** and **antioxidant properties**.

The main **goal** of this study was to evaluate the **influence** of an **anthocyanin-rich elderberry extract** (EE) on **mice** for 29 days and to assess its safety when used as **natural food colorant**.

## Methodology

The anthocyanin profile was determined using **HPLC-DAD-ESI/MS**. This study (Fig. 1) was approved by the University of Trás-os-Montes and Alto Douro Ethics committee (approval no. 10/2013) and the Portuguese Veterinary Authorities (approval no. 0421/000/000/2014).

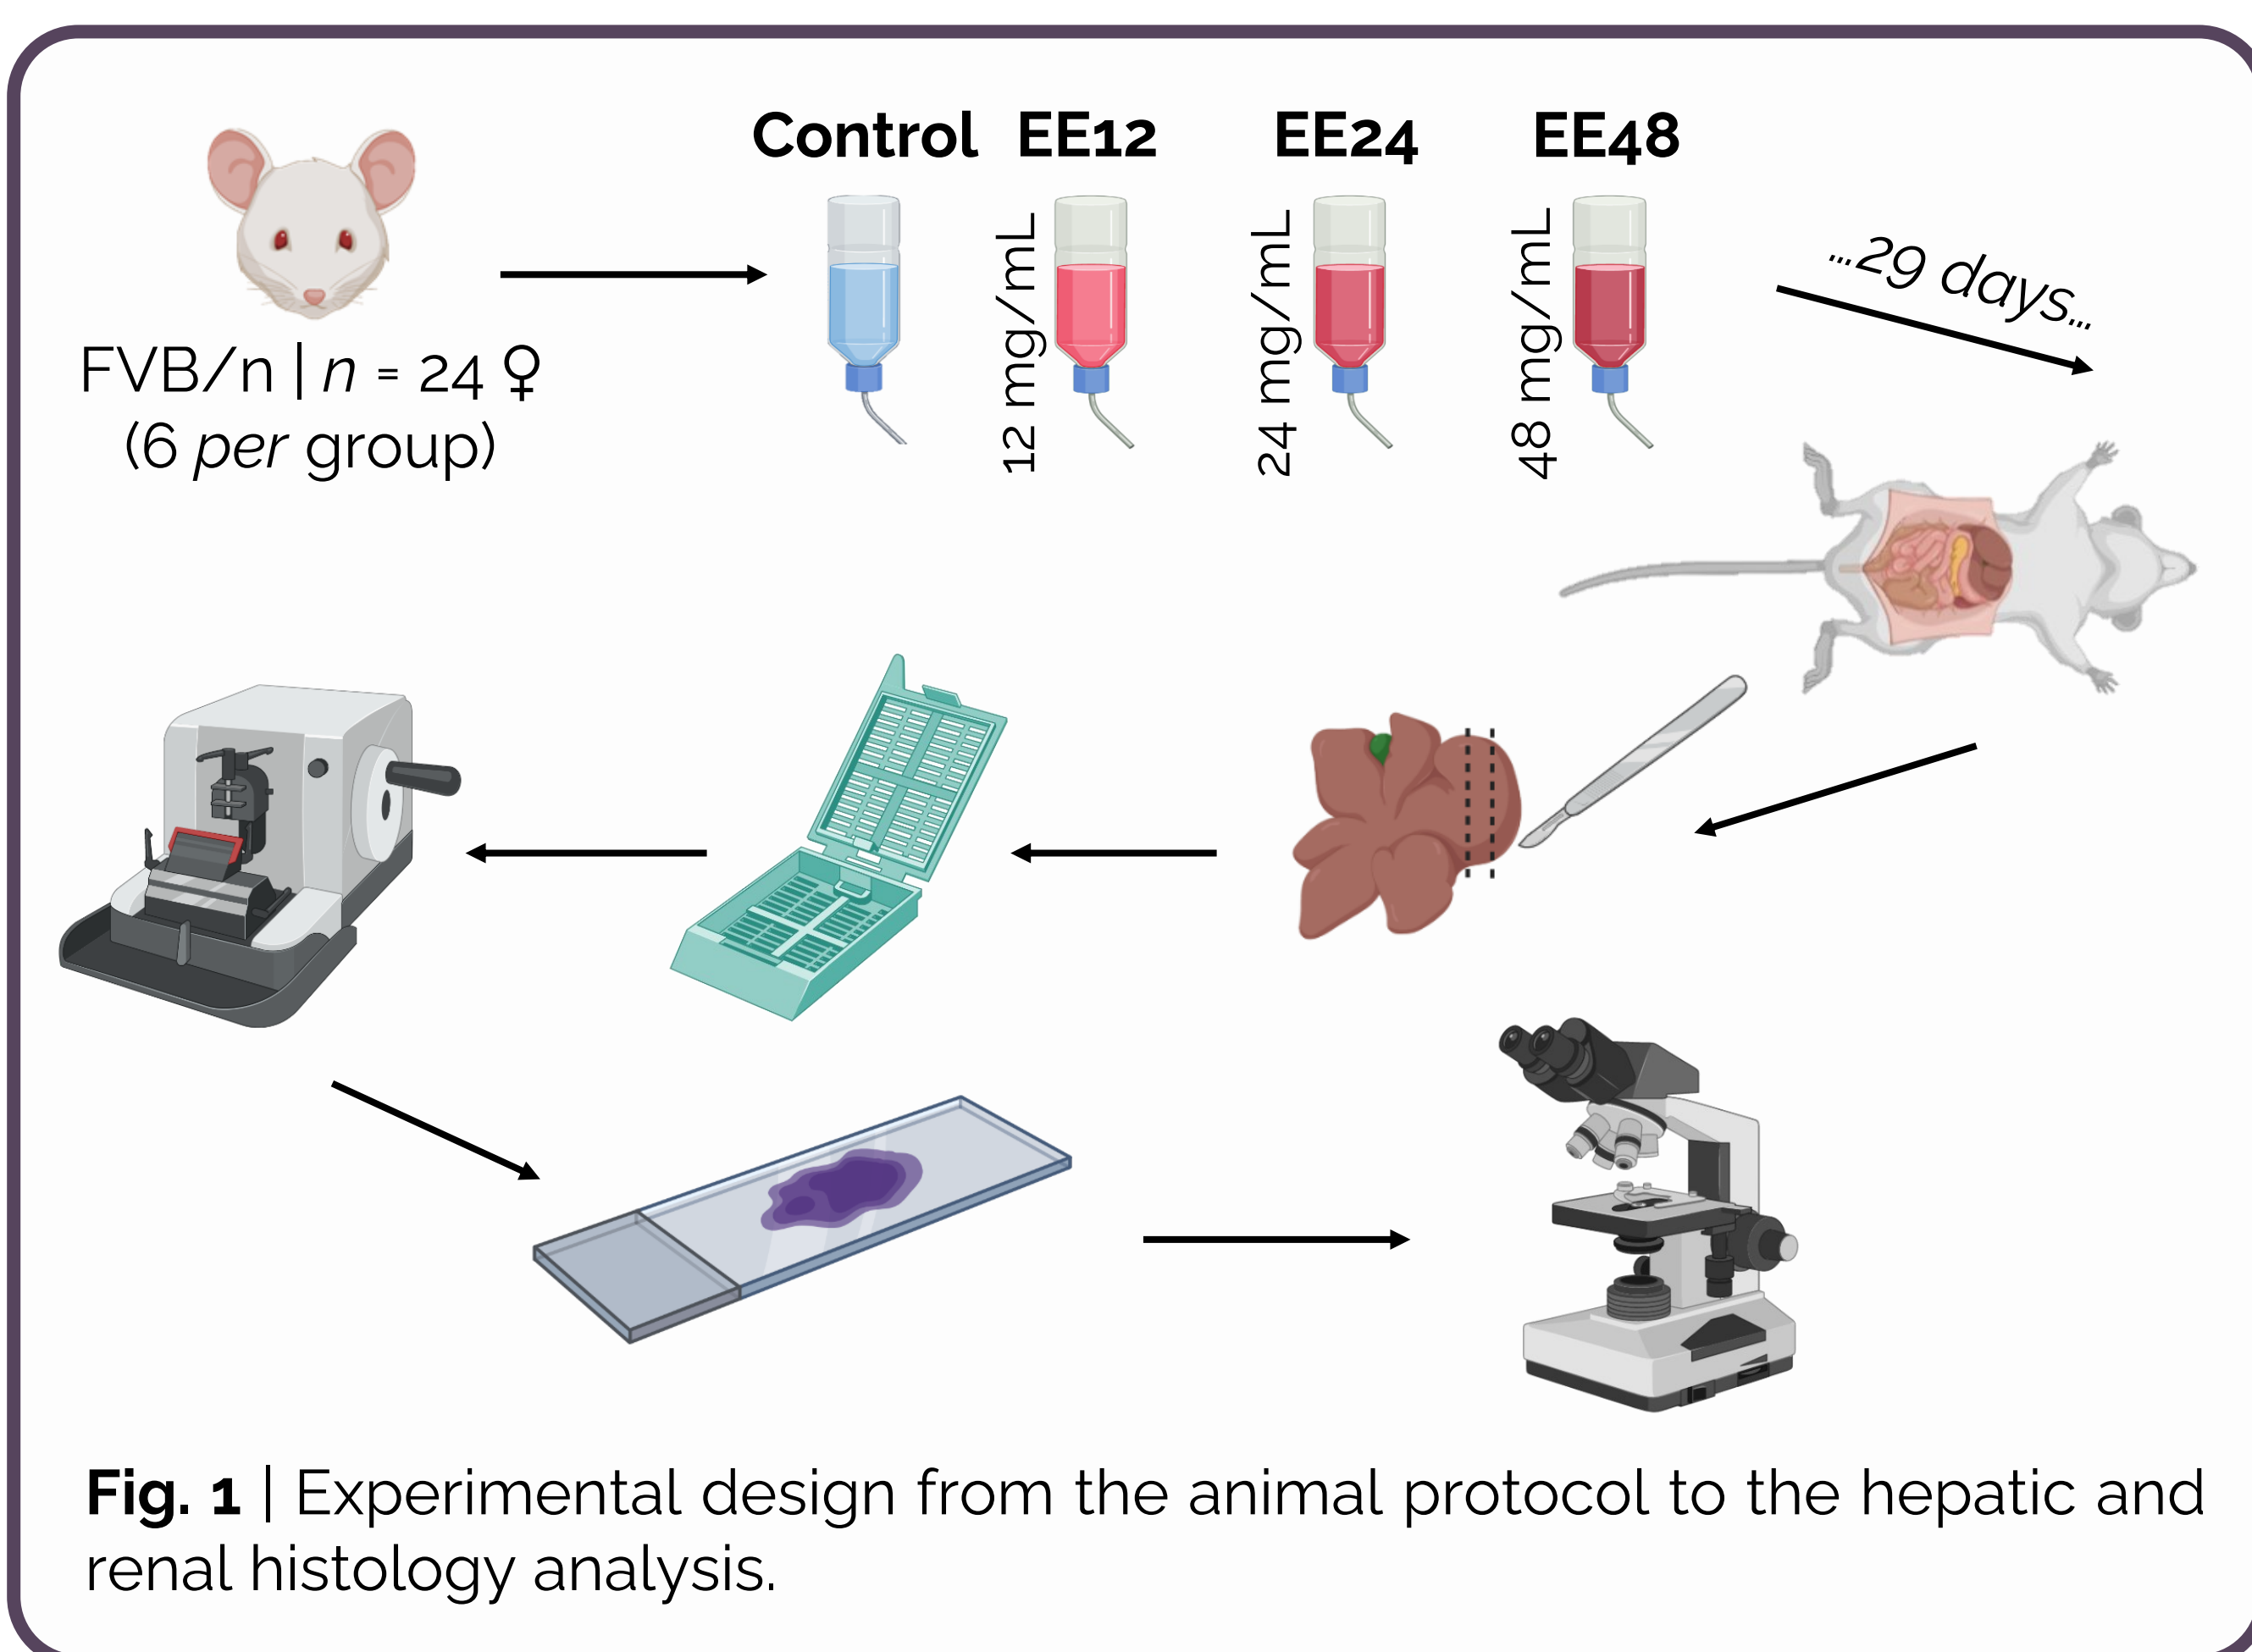

**Fig. 1** | Experimental design from the animal protocol to the hepatic and renal histology analysis.

**EE** was supplemented in **drinking water *ad libitum*** and changed every **2-3 days** due to the compounds' stability. The same researcher assessed **humane endpoints** on a **weekly basis**. Animals were humanely sacrificed by intraperitoneal injection of **xylazine** and **ketamine**, followed by **exsanguination** by cardiac puncture. A **complete necropsy** was performed. For **histopathological analysis**, **liver** and **kidney** samples were collected and **fixed in 10% buffered formalin**, sectioned, and processed for paraffin embedding. Sections were **stained with haematoxylin and eosin** and observed under **light microscope**.

## Results

The predominant anthocyanins detected were cyanidin-3-O-sambubioside-5-O-glucoside and cyanidin-3-O-sambubioside. The evaluation of Humane endpoints revealed **no behavioural changes** in the animals after EE supplementation. Histological analysis of the liver (Fig. 2) showed a **significant difference** ( $p = 0.036$ ) between Control (80.0%) and EE12 (16.7%), with the **Control groups' histology exhibiting overall hydropic changes**. These changes presented a **generalized distribution** in Control mice, whereas the other groups exhibited hydropic changes at the **centrilobular zone**. **Inflammation** in the **liver** was also assessed, with **at least one animal** in each group exhibiting chronic focal hepatitis. Apart from **one case of chronic interstitial nephritis** in EE24, **no histological changes** were observed regarding the kidney's histology.

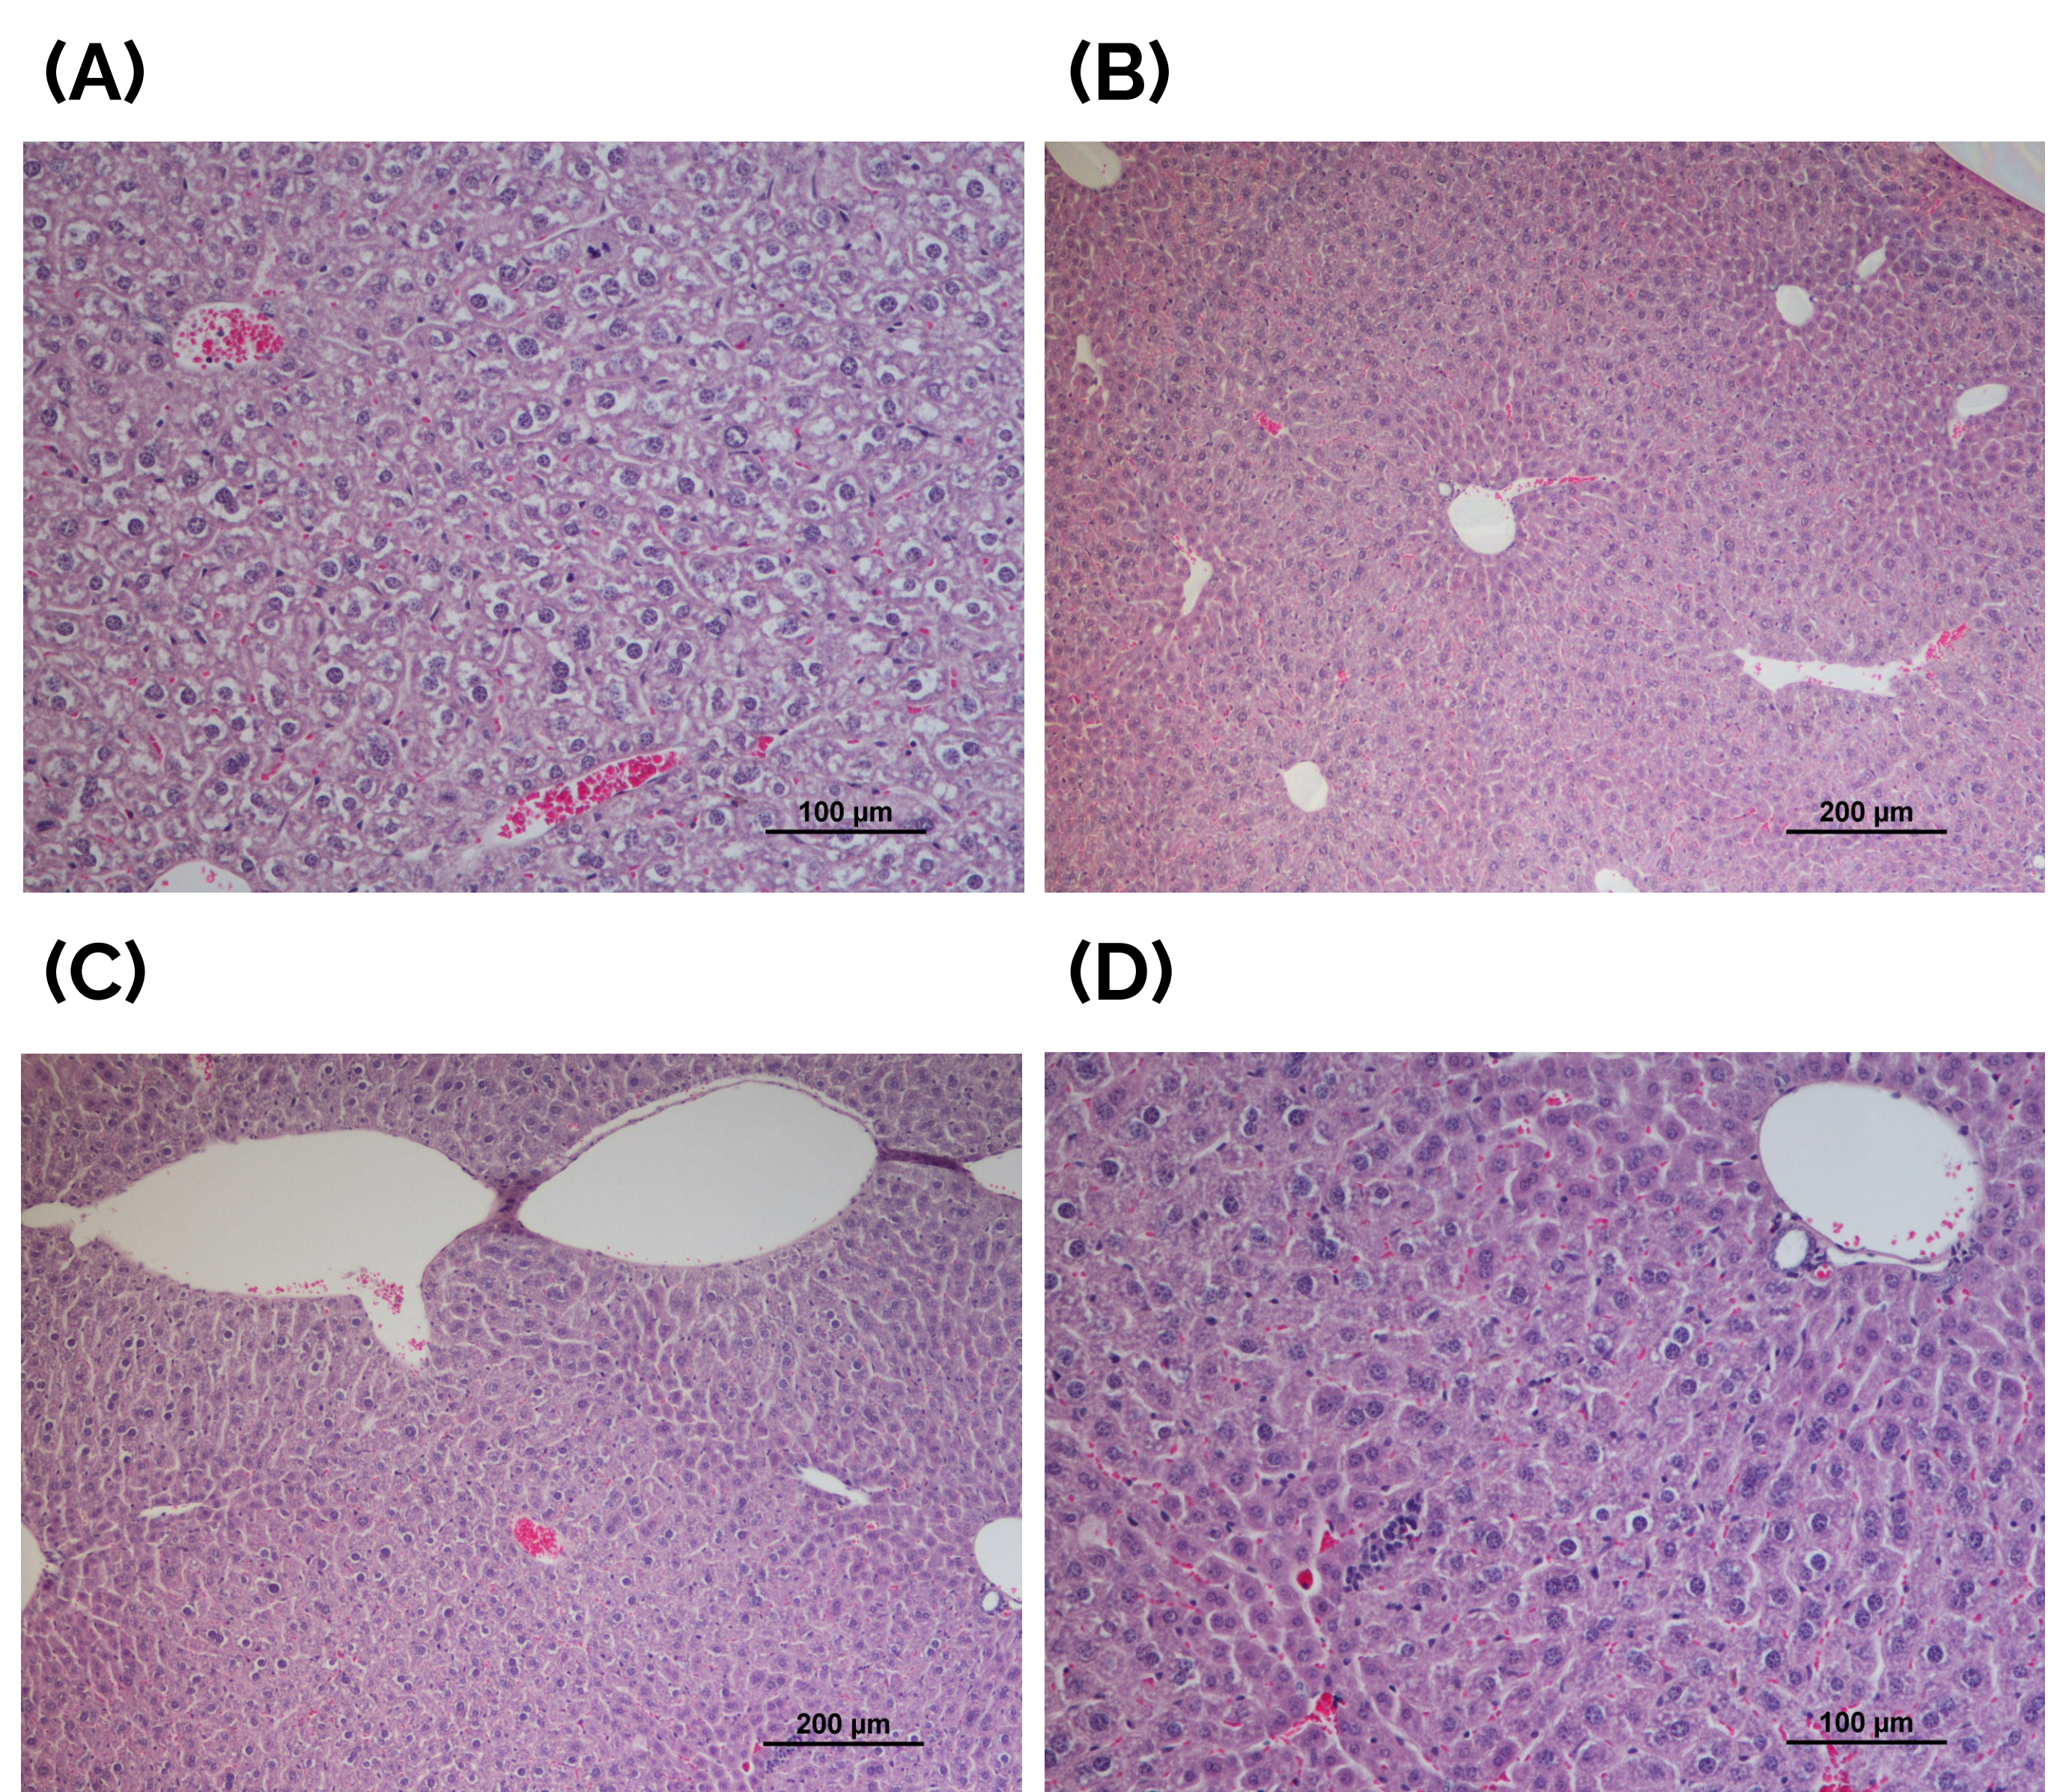

**Fig. 2** | Microscopic images (staining with hematoxylin and eosin) of liver sections from the different groups under study. **A)** cellular tumefaction and hydropic changes in a mouse's liver from the control group; **B)** hydropic changes observable only in the centrilobular region in an animal's liver from EE12; **C)** cellular tumefaction and centrilobular hydropic changes in a mouse's liver from EE24; **D)** cellular tumefaction, centrilobular hydropic changes, multifocal inflammatory infiltrate in an animal from the EE48.

## Concluding remarks

The results suggest that elderberry extract supplementation does not appear to **cause toxicological effects** in kidney or liver structure or function with pathological significance. Further studies should help understand if elderberry has a protective impact on these tissues.
